# Supplementary material for: 1H NMR spectroscopic identification of binding modes of 2,2′-bipyridine ligands in complexes of square-planar d8 metal ions
Source: Royal Society of Chemistry journal article supplement (doi:10.1039/b904173g), 2009-01-01
Supplement: b904173g.pdf [file b904173g.pdf]

# <sup>1</sup>H NMR spectroscopic identification of binding modes of 2,2'-bipyridine ligands in complexes of square-planar d<sup>8</sup> metal ions

Wei-Zheng Shen, Gabriele Trötscher-Kaus, Bernhard Lippert\*

## SUPPORTING INFORMATION

**Figure SI-1.** <sup>1</sup>H NMR spectra of 2,2'-bpy (D<sub>2</sub>O, pD 7.0) at different concentrations.

**Figure SI-2.** <sup>1</sup>H NMR spectrum of **4** in D<sub>2</sub>O, pD 7.8. The H5\* doublet of 1-MeU is split in a 1:1 ratio, attributed to the existence of *hh* and *ht* orientated 1-MeU ligands.

**Figure SI-3.** <sup>1</sup>H NMR spectrum (600 MHz) of **17** in D<sub>2</sub>O, pD 7.0,

**Figure SI-4.** A view showing the packing of the different enantiomers of the *head-tail* dimeric compound **17**. [Symmetry codes: (2A to 2B)  $-x, 1-y, -z$  (1A to 1C)  $1-x, 1-y, -z$ .]

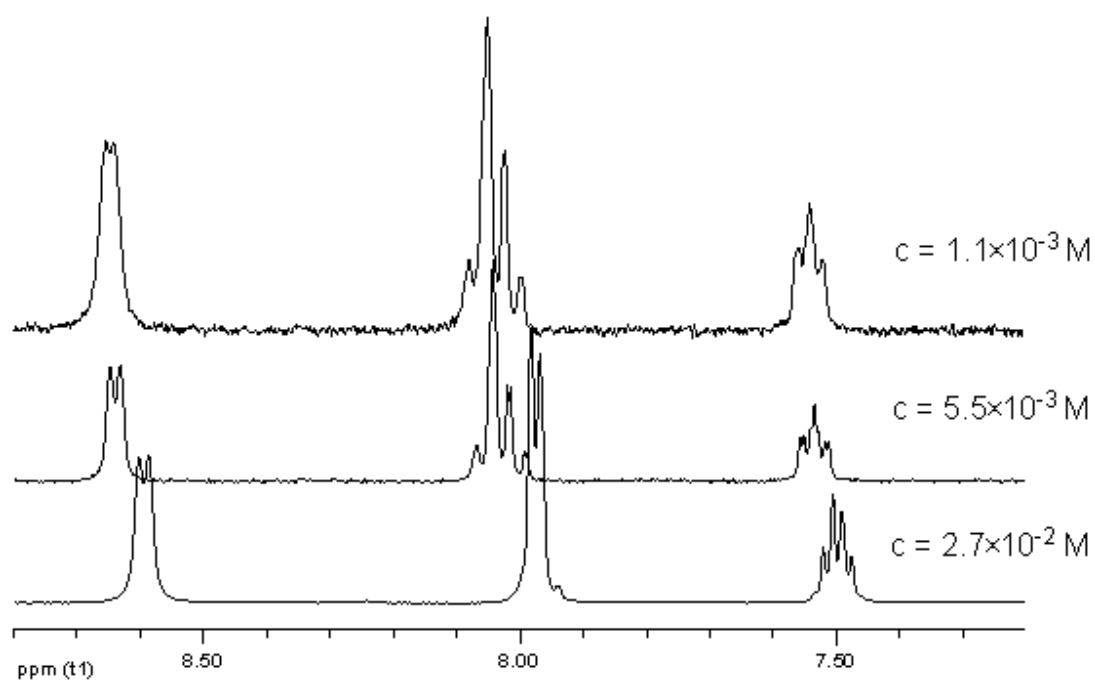

**Figure SI-1**

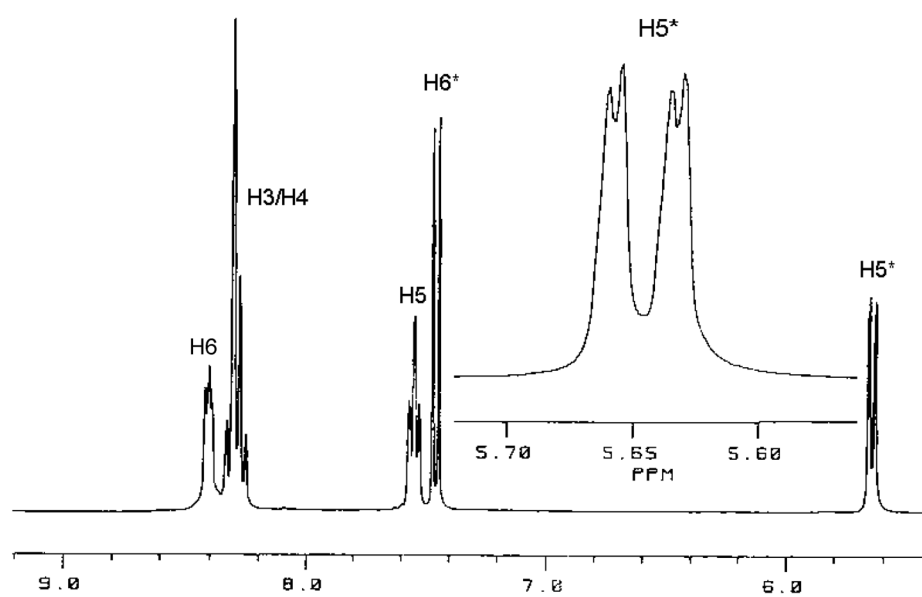

**Figure SI-2**

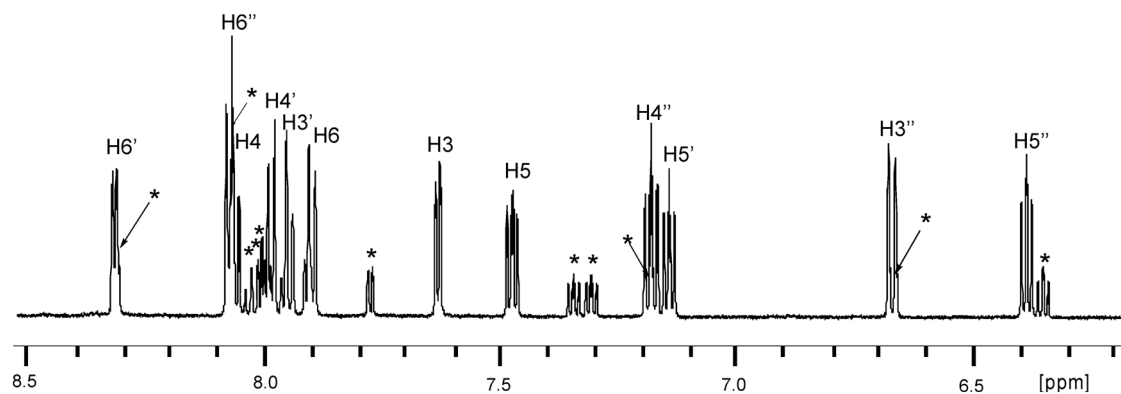

**Figure SI-3**

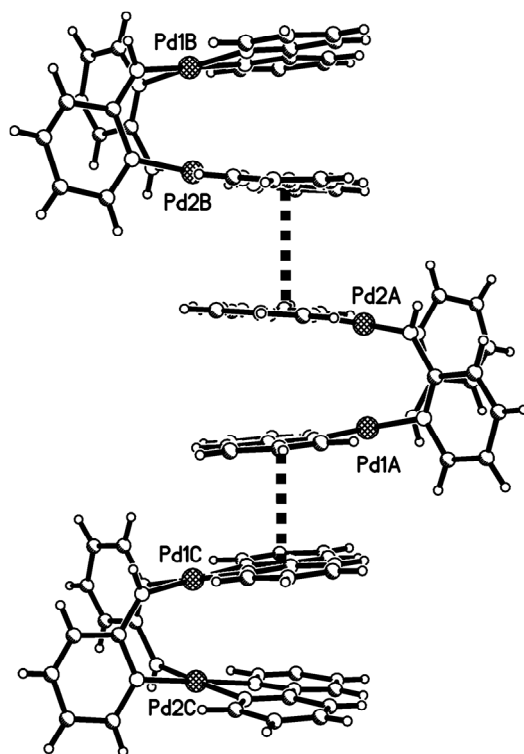

**Figure SI-4**
